# Supplementary material
Source: PubMed Central journal article supplement (PMC5446485)

**Table S1. List of human lysine deacetylases**

| <b>OfficialSymbol</b> | <b>Official Full Name</b> | <b>Other Aliases</b>                                                | <b>Gene ID</b> | <b>Gene Location</b> |
|-----------------------|---------------------------|---------------------------------------------------------------------|----------------|----------------------|
| HDAC1                 | histone deacetylase 1     | HD1; RPD3; GON-10; RPD3L1                                           | 3065           | 1p35                 |
| HDAC2                 | histone deacetylase 2     | HD2; RPD3; YAF1                                                     | 3066           | 6q21                 |
| HDAC3                 | histone deacetylase 3     | HD3; RPD3; RPD3-2                                                   | 8841           | 5q31.3               |
| HDAC4                 | histone deacetylase 4     | HD4; AHO3; BDMR; HDACA; HA6116;<br>HDAC-4; HDAC-A                   | 9759           | 2q37.3               |
| HDAC5                 | histone deacetylase 5     | HD5; NY-CO-9                                                        | 10014          | 17q21.31             |
| HDAC6                 | histone deacetylase 6     | HD6; JM21; CPBHM; PPP1R90                                           | 10013          | Xp11.23              |
| HDAC7                 | histone deacetylase 7     | HD7; HD7A; HDAC7A                                                   | 51564          | 12q13.11             |
| HDAC8                 | histone deacetylase 8     | HD8; WTS; RPD3; CDA07; CDLS5;<br>MRXS6; HDACL1                      | 55869          | Xq13.1               |
| HDAC9                 | histone deacetylase 9     | HD7; HD9; HD7b; HDAC; HDRP; MITR;<br>HDAC7; HDAC7B; HDAC9B; HDAC9FL | 9734           | 7p21.1               |
| HDAC10                | histone deacetylase 10    | HD10                                                                | 83933          | 22q13.33             |
| HDAC11                | histone deacetylase 11    | HD11                                                                | 79885          | 3p25.1               |
| SIRT1                 | sirtuin 1                 | SIR2; SIR2L1; SIR2alpha                                             | 23411          | 10q21.3              |
| SIRT2                 | sirtuin 2                 | SIR2; SIR2L; SIR2L2                                                 | 22933          | 19q13.2              |
| SIRT3                 | sirtuin 3                 | SIR2L3                                                              | 23410          | 11p15.5              |
| SIRT4                 | sirtuin 4                 | SIR2L4                                                              | 23409          | 12q24.31             |
| SIRT5                 | sirtuin 5                 | SIR2L5                                                              | 23408          | 6p23                 |
| SIRT6                 | sirtuin 6                 | SIR2L6                                                              | 51548          | 19p13.3              |
| SIRT7                 | sirtuin 7                 | SIR2L7                                                              | 51547          | 17q25.3              |

**Table S2. Correlation between copy number and mRNA expression of HDACs in TCGA breast cancers**

| <b>Gene</b> | <b>Pearson</b> | <b>Kendall</b> | <b>Spearman</b> |
|-------------|----------------|----------------|-----------------|
| HDAC1       | 0.44           | 0.48           | 0.36            |
| HDAC2       | 0.62           | 0.59           | 0.51            |
| HDAC3       | 0.44           | 0.43           | 0.35            |
| HDAC4       | 0.32           | 0.28           | 0.26            |
| HDAC5       | 0.44           | 0.40           | 0.35            |
| HDAC6       | 0.00           | 0.07           | 0.00            |
| HDAC7       | 0.22           | 0.21           | 0.17            |
| HDAC8       | 0.03           | 0.06           | 0.03            |
| HDAC9       | 0.02           | 0.03           | 0.02            |
| HDAC10      | 0.26           | 0.25           | 0.21            |
| HDAC11      | 0.31           | 0.33           | 0.25            |
| SIRT1       | 0.38           | 0.41           | 0.30            |
| SIRT2       | 0.45           | 0.47           | 0.36            |
| SIRT3       | 0.53           | 0.46           | 0.42            |
| SIRT4       | 0.19           | 0.19           | 0.15            |
| SIRT5       | 0.46           | 0.50           | 0.37            |
| SIRT6       | 0.32           | 0.28           | 0.25            |
| SIRT7       | 0.44           | 0.45           | 0.35            |

Table S3. Frequency (%) of HDAC genetic alterations and expression levels in five subtypes of TCGA breast cancers

| Gene        | DNA Alterations |       |         |         |        |          | mRNA Expression Levels |                  |               |
|-------------|-----------------|-------|---------|---------|--------|----------|------------------------|------------------|---------------|
|             | Amp             | Gain  | Diploid | Hetloss | Homdel | Mutation | Z Score >= 1           | 1 > Z Score > -1 | Z Score <= -1 |
| Normal-Like | HDAC1           | 0.00  | 13.64   | 86.36   | 0.00   | 0.00     | 4.55                   | 63.64            | 31.82         |
|             | HDAC2           | 0.00  | 9.09    | 72.73   | 18.18  | 0.00     | 0.00                   | 90.91            | 9.09          |
|             | HDAC3           | 0.00  | 0.00    | 81.82   | 18.18  | 0.00     | 0.00                   | 86.36            | 13.64         |
|             | HDAC4           | 0.00  | 0.00    | 90.91   | 9.09   | 0.00     | 4.55                   | 50.00            | 9.09          |
|             | HDAC5           | 0.00  | 0.00    | 77.27   | 18.18  | 4.55     | 0.00                   | 4.55             | 9.09          |
|             | HDAC6           | 0.00  | 9.09    | 81.82   | 9.09   | 0.00     | 0.00                   | 13.64            | 81.82         |
|             | HDAC7           | 0.00  | 0.00    | 95.45   | 4.55   | 0.00     | 0.00                   | 4.55             | 86.36         |
|             | HDAC8           | 0.00  | 4.55    | 86.36   | 9.09   | 0.00     | 4.55                   | 9.09             | 77.27         |
|             | HDAC9           | 4.55  | 9.09    | 81.82   | 4.55   | 0.00     | 0.00                   | 9.09             | 90.91         |
|             | HDAC10          | 0.00  | 9.09    | 77.27   | 13.64  | 0.00     | 0.00                   | 0.00             | 72.73         |
|             | HDAC11          | 0.00  | 0.00    | 77.27   | 22.73  | 0.00     | 0.00                   | 0.00             | 54.55         |
|             | SIRT1           | 0.00  | 4.55    | 86.36   | 9.09   | 0.00     | 0.00                   | 13.64            | 81.82         |
|             | SIRT2           | 0.00  | 18.18   | 77.27   | 4.55   | 0.00     | 0.00                   | 27.27            | 68.18         |
|             | SIRT3           | 0.00  | 9.09    | 77.27   | 13.64  | 0.00     | 0.00                   | 0.00             | 72.73         |
|             | SIRT4           | 0.00  | 0.00    | 90.91   | 9.09   | 0.00     | 0.00                   | 0.00             | 90.91         |
|             | SIRT5           | 0.00  | 4.55    | 86.36   | 9.09   | 0.00     | 0.00                   | 9.09             | 68.18         |
|             | SIRT6           | 0.00  | 9.09    | 81.82   | 9.09   | 0.00     | 0.00                   | 4.55             | 86.36         |
| SIRT7       | 0.00            | 13.64 | 68.18   | 18.18   | 0.00   | 0.00     | 4.55                   | 59.09            |               |
| Luminal A   | HDAC1           | 0.25  | 2.47    | 68.64   | 28.64  | 0.00     | 0.49                   | 10.62            | 67.65         |
|             | HDAC2           | 0.99  | 6.42    | 60.74   | 31.36  | 0.49     | 0.25                   | 2.72             | 80.25         |
|             | HDAC3           | 0.49  | 23.70   | 69.38   | 6.42   | 0.00     | 0.00                   | 8.89             | 76.54         |
|             | HDAC4           | 0.00  | 2.22    | 77.78   | 20.00  | 0.00     | 0.25                   | 9.14             | 76.30         |
|             | HDAC5           | 0.74  | 20.49   | 57.04   | 21.73  | 0.00     | 0.49                   | 7.65             | 74.81         |
|             | HDAC6           | 0.49  | 10.12   | 76.79   | 12.59  | 0.00     | 1.48                   | 9.38             | 79.51         |
|             | HDAC7           | 0.74  | 17.04   | 78.27   | 3.95   | 0.00     | 0.25                   | 7.65             | 83.95         |
|             | HDAC8           | 0.25  | 9.14    | 77.04   | 13.33  | 0.25     | 0.25                   | 9.14             | 81.48         |
|             | HDAC9           | 1.48  | 26.91   | 66.42   | 5.19   | 0.00     | 0.00                   | 6.67             | 93.33         |
|             | HDAC10          | 0.00  | 5.43    | 49.14   | 44.94  | 0.49     | 0.00                   | 3.21             | 83.21         |
|             | HDAC11          | 0.00  | 11.85   | 79.26   | 8.89   | 0.00     | 0.25                   | 11.36            | 82.22         |
|             | SIRT1           | 0.25  | 7.41    | 77.28   | 15.06  | 0.00     | 0.00                   | 19.01            | 76.30         |
|             | SIRT2           | 1.23  | 17.53   | 73.09   | 8.15   | 0.00     | 0.00                   | 8.15             | 77.53         |
|             | SIRT3           | 0.25  | 12.35   | 69.14   | 18.02  | 0.25     | 0.25                   | 7.90             | 78.27         |
|             | SIRT4           | 0.49  | 14.81   | 73.58   | 10.62  | 0.49     | 0.00                   | 9.38             | 75.56         |
|             | SIRT5           | 1.48  | 14.57   | 73.09   | 10.86  | 0.00     | 0.25                   | 13.33            | 70.37         |
|             | SIRT6           | 0.74  | 13.83   | 70.86   | 14.57  | 0.00     | 0.00                   | 2.96             | 91.11         |
| SIRT7       | 2.72            | 23.70 | 59.26   | 13.83   | 0.49   | 0.00     | 6.42                   | 77.04            |               |
| Luminal B   | HDAC1           | 1.08  | 8.65    | 36.22   | 54.05  | 0.00     | 0.00                   | 20.00            | 64.86         |
|             | HDAC2           | 0.54  | 10.27   | 39.46   | 48.65  | 1.08     | 0.00                   | 12.43            | 74.59         |
|             | HDAC3           | 0.00  | 27.57   | 53.51   | 18.92  | 0.00     | 0.54                   | 11.89            | 64.86         |
|             | HDAC4           | 0.00  | 5.95    | 53.51   | 39.46  | 1.08     | 0.54                   | 2.16             | 61.08         |
|             | HDAC5           | 2.70  | 34.59   | 28.65   | 33.51  | 0.54     | 0.54                   | 5.95             | 55.14         |
|             | HDAC6           | 0.54  | 24.32   | 52.97   | 22.16  | 0.00     | 2.16                   | 16.76            | 67.57         |
|             | HDAC7           | 0.54  | 36.76   | 54.05   | 8.65   | 0.00     | 0.00                   | 0.54             | 73.51         |
|             | HDAC8           | 0.00  | 14.59   | 57.30   | 28.11  | 0.00     | 0.54                   | 14.05            | 67.03         |
|             | HDAC9           | 0.54  | 36.22   | 47.57   | 15.68  | 0.00     | 0.54                   | 7.57             | 92.43         |
|             | HDAC10          | 1.08  | 12.43   | 30.81   | 54.59  | 1.08     | 0.00                   | 5.41             | 72.97         |
|             | HDAC11          | 1.62  | 31.35   | 49.73   | 17.30  | 0.00     | 0.54                   | 20.54            | 70.97         |
|             | SIRT1           | 1.62  | 15.14   | 52.97   | 29.19  | 1.08     | 0.54                   | 16.22            | 67.03         |
|             | SIRT2           | 0.00  | 21.08   | 48.11   | 30.27  | 0.54     | 0.54                   | 9.19             | 63.24         |
|             | SIRT3           | 0.00  | 21.62   | 43.78   | 32.43  | 2.16     | 0.00                   | 5.95             | 61.62         |
|             | SIRT4           | 0.54  | 31.89   | 52.43   | 15.14  | 0.00     | 0.00                   | 8.11             | 69.73         |
|             | SIRT5           | 0.54  | 31.89   | 48.11   | 18.92  | 0.54     | 0.00                   | 27.03            | 56.22         |
|             | SIRT6           | 1.62  | 12.43   | 40.54   | 45.41  | 0.00     | 0.00                   | 2.70             | 80.54         |
| SIRT7       | 9.19            | 48.65 | 27.57   | 14.05   | 0.54   | 0.00     | 20.00                  | 63.24            |               |
| HER2        | HDAC1           | 0.00  | 10.61   | 42.42   | 45.45  | 1.52     | 0.00                   | 13.64            | 56.06         |
|             | HDAC2           | 7.58  | 27.27   | 43.94   | 21.21  | 0.00     | 0.00                   | 42.42            | 54.55         |
|             | HDAC3           | 0.00  | 13.64   | 53.03   | 33.33  | 0.00     | 0.00                   | 10.61            | 65.15         |
|             | HDAC4           | 0.00  | 16.67   | 46.97   | 36.36  | 0.00     | 0.00                   | 6.06             | 74.24         |
|             | HDAC5           | 0.00  | 4.55    | 12.12   | 80.30  | 3.03     | 1.52                   | 0.00             | 22.73         |
|             | HDAC6           | 1.52  | 19.70   | 59.09   | 19.70  | 0.00     | 4.55                   | 16.67            | 56.06         |
|             | HDAC7           | 0.00  | 24.24   | 60.61   | 15.15  | 0.00     | 0.00                   | 3.03             | 56.06         |
|             | HDAC8           | 0.00  | 21.21   | 57.58   | 21.21  | 0.00     | 0.00                   | 13.64            | 65.15         |
|             | HDAC9           | 4.55  | 34.85   | 53.03   | 7.58   | 0.00     | 0.00                   | 9.09             | 90.91         |
|             | HDAC10          | 4.55  | 24.24   | 45.45   | 24.24  | 1.52     | 0.00                   | 4.55             | 69.70         |
|             | HDAC11          | 3.03  | 21.21   | 43.94   | 30.30  | 1.52     | 0.00                   | 1.52             | 54.55         |
|             | SIRT1           | 0.00  | 31.82   | 46.97   | 21.21  | 0.00     | 0.00                   | 10.61            | 72.73         |
|             | SIRT2           | 3.03  | 25.76   | 39.39   | 31.82  | 0.00     | 0.00                   | 16.67            | 59.09         |
|             | SIRT3           | 0.00  | 10.61   | 42.42   | 45.45  | 1.52     | 0.00                   | 1.52             | 54.55         |
|             | SIRT4           | 3.03  | 19.70   | 53.03   | 24.24  | 0.00     | 0.00                   | 15.15            | 71.21         |
|             | SIRT5           | 4.55  | 28.79   | 54.55   | 12.12  | 0.00     | 0.00                   | 16.67            | 68.18         |
|             | SIRT6           | 1.52  | 10.61   | 51.52   | 36.36  | 0.00     | 0.00                   | 6.06             | 83.33         |
| SIRT7       | 12.12           | 25.76 | 28.79   | 31.82   | 1.52   | 1.52     | 18.18                  | 57.58            |               |
| Basal-Like  | HDAC1           | 2.31  | 26.15   | 43.85   | 26.92  | 0.77     | 1.54                   | 25.38            | 63.08         |
|             | HDAC2           | 3.08  | 36.92   | 37.69   | 22.31  | 0.00     | 0.77                   | 61.54            | 37.69         |
|             | HDAC3           | 0.00  | 5.38    | 26.15   | 68.46  | 0.00     | 0.00                   | 15.38            | 58.46         |
|             | HDAC4           | 0.00  | 14.62   | 40.00   | 42.31  | 3.08     | 0.00                   | 24.62            | 66.92         |
|             | HDAC5           | 0.00  | 8.46    | 34.62   | 56.15  | 0.77     | 0.00                   | 16.92            | 58.46         |
|             | HDAC6           | 1.54  | 27.69   | 48.46   | 20.77  | 1.54     | 0.77                   | 17.69            | 59.23         |
|             | HDAC7           | 0.00  | 10.77   | 33.85   | 55.38  | 0.00     | 0.00                   | 1.54             | 50.77         |
|             | HDAC8           | 0.00  | 30.00   | 48.46   | 20.77  | 0.77     | 0.00                   | 28.46            | 56.15         |
|             | HDAC9           | 0.77  | 33.85   | 35.38   | 29.23  | 0.77     | 2.31                   | 16.92            | 83.08         |
|             | HDAC10          | 1.54  | 26.92   | 30.00   | 40.00  | 1.54     | 0.00                   | 2.31             | 60.00         |
|             | HDAC11          | 3.08  | 22.31   | 38.46   | 36.15  | 0.00     | 0.00                   | 3.85             | 46.92         |
|             | SIRT1           | 1.54  | 21.54   | 43.85   | 33.08  | 0.00     | 0.00                   | 11.54            | 56.15         |
|             | SIRT2           | 8.46  | 37.69   | 37.69   | 16.15  | 0.00     | 0.00                   | 37.69            | 51.54         |
|             | SIRT3           | 0.00  | 15.38   | 31.54   | 49.23  | 3.85     | 0.00                   | 1.54             | 29.23         |
|             | SIRT4           | 0.00  | 10.00   | 44.62   | 45.38  | 0.00     | 0.00                   | 22.31            | 64.62         |
|             | SIRT5           | 7.69  | 46.92   | 33.85   | 10.00  | 1.54     | 0.00                   | 46.92            | 41.54         |
|             | SIRT6           | 0.77  | 16.15   | 33.08   | 47.69  | 2.31     | 0.00                   | 8.46             | 72.31         |
| SIRT7       | 8.46            | 43.08 | 26.92   | 21.54   | 0.00   | 1.54     | 22.31                  | 69.23            |               |

**Table S4. Frequency (%) of HDAC genetic alterations and expression levels in METABRIC breast cancers**

| Gene   | DNA Alterations |       |         |         |        | mRNA Expression Levels |                      |                   |
|--------|-----------------|-------|---------|---------|--------|------------------------|----------------------|-------------------|
|        | Amp             | Gain  | Diploid | Hetloss | Homdel | Z Score $\geq 1$       | $1 > Z$ Score $> -1$ | Z Score $\leq -1$ |
| HDAC1  | 0.10            | 1.97  | 93.43   | 4.49    | 0.00   | 15.45                  | 67.88                | 16.67             |
| HDAC2  | 0.15            | 3.43  | 86.92   | 9.39    | 0.10   | 16.67                  | 64.34                | 18.99             |
| HDAC3  | 0.00            | 4.34  | 93.64   | 2.02    | 0.00   | 16.62                  | 67.58                | 15.81             |
| HDAC4  | 0.76            | 1.26  | 94.49   | 3.18    | 0.30   | 16.01                  | 66.67                | 17.32             |
| HDAC5  | 0.05            | 5.45  | 89.80   | 4.65    | 0.05   | 14.70                  | 73.84                | 11.46             |
| HDAC6  | 0.10            | 3.18  | 91.11   | 5.56    | 0.05   | 14.95                  | 71.62                | 13.43             |
| HDAC7  | 0.20            | 4.39  | 94.75   | 0.56    | 0.10   | 10.76                  | 78.13                | 11.11             |
| HDAC8  | 0.05            | 2.53  | 91.26   | 6.16    | 0.00   | 13.89                  | 73.33                | 12.78             |
| HDAC9  | 0.66            | 8.69  | 88.59   | 1.36    | 0.71   | 14.75                  | 71.06                | 14.19             |
| HDAC10 | 0.05            | 3.79  | 84.55   | 11.57   | 0.05   | N/A                    | N/A                  | N/A               |
| HDAC11 | 0.25            | 3.94  | 94.44   | 1.31    | 0.05   | 16.67                  | 66.52                | 16.82             |
| SIRT1  | 0.25            | 1.41  | 96.36   | 1.97    | 0.00   | 13.69                  | 70.91                | 15.40             |
| SIRT2  | 0.25            | 5.00  | 93.48   | 1.26    | 0.00   | 15.20                  | 72.02                | 12.78             |
| SIRT3  | 0.45            | 3.48  | 91.16   | 4.90    | 0.00   | 14.70                  | 70.61                | 14.70             |
| SIRT4  | 0.00            | 3.03  | 94.70   | 2.12    | 0.15   | 15.61                  | 68.43                | 15.96             |
| SIRT5  | 0.25            | 6.16  | 92.07   | 1.52    | 0.00   | 18.74                  | 66.46                | 14.80             |
| SIRT6  | 0.10            | 3.43  | 92.78   | 3.69    | 0.00   | 13.59                  | 72.37                | 14.04             |
| SIRT7  | 0.51            | 12.47 | 84.65   | 2.32    | 0.05   | 18.94                  | 68.23                | 12.83             |



Table S5. Frequency (%) of HDAC genetic alterations and expression levels in five subtypes of METABRIC breast cancers

| Gene               | DNA Alterations |      |         |         |        | mRNA Expression Levels |                  |               |       |
|--------------------|-----------------|------|---------|---------|--------|------------------------|------------------|---------------|-------|
|                    | Amp             | Gain | Diploid | Hetloss | Homdel | Z Score >= 1           | 1 > Z Score >- 1 | Z Score <= -1 |       |
| <b>Normal-Like</b> | HDAC1           | 0.00 | 0.50    | 96.98   | 2.51   | 0.00                   | 9.05             | 74.37         | 16.58 |
|                    | HDAC2           | 0.00 | 0.50    | 95.48   | 4.02   | 0.00                   | 5.53             | 71.86         | 22.61 |
|                    | HDAC3           | 0.00 | 1.51    | 96.98   | 1.51   | 0.00                   | 17.59            | 70.85         | 11.56 |
|                    | HDAC4           | 0.50 | 0.50    | 96.48   | 2.01   | 0.50                   | 18.09            | 68.84         | 13.07 |
|                    | HDAC5           | 0.00 | 1.01    | 95.98   | 3.02   | 0.00                   | 18.59            | 77.89         | 3.52  |
|                    | HDAC6           | 0.00 | 1.51    | 94.97   | 3.52   | 0.00                   | 12.06            | 70.35         | 17.59 |
|                    | HDAC7           | 0.00 | 2.01    | 96.98   | 1.01   | 0.00                   | 8.04             | 81.41         | 10.55 |
|                    | HDAC8           | 0.00 | 1.51    | 95.98   | 2.51   | 0.00                   | 6.53             | 69.85         | 23.62 |
|                    | HDAC9           | 1.01 | 5.53    | 91.46   | 1.51   | 0.50                   | 16.58            | 67.84         | 15.58 |
|                    | HDAC10          | 0.00 | 2.51    | 91.96   | 5.53   | 0.00                   | NA               | NA            | NA    |
|                    | HDAC11          | 0.00 | 1.01    | 97.99   | 1.01   | 0.00                   | 9.05             | 69.35         | 21.61 |
|                    | SIRT1           | 0.00 | 1.01    | 96.98   | 2.01   | 0.00                   | 11.56            | 73.37         | 15.08 |
|                    | SIRT2           | 0.00 | 3.02    | 95.98   | 1.01   | 0.00                   | 11.56            | 78.39         | 10.05 |
|                    | SIRT3           | 1.01 | 1.01    | 94.47   | 3.52   | 0.00                   | 17.09            | 68.34         | 14.57 |
|                    | SIRT4           | 0.00 | 1.51    | 96.48   | 1.51   | 0.50                   | 16.58            | 70.35         | 13.07 |
|                    | SIRT5           | 0.00 | 3.52    | 95.48   | 1.01   | 0.00                   | 9.55             | 74.87         | 15.58 |
|                    | SIRT6           | 1.01 | 3.02    | 94.47   | 1.51   | 0.00                   | 10.55            | 71.36         | 18.09 |
|                    | SIRT7           | 0.50 | 4.02    | 92.46   | 3.02   | 0.00                   | 7.54             | 70.85         | 21.61 |
| <b>Luminal A</b>   | HDAC1           | 0.14 | 1.11    | 95.68   | 3.06   | 0.00                   | 13.09            | 75.07         | 11.84 |
|                    | HDAC2           | 0.00 | 1.81    | 88.16   | 10.03  | 0.00                   | 4.46             | 70.89         | 24.65 |
|                    | HDAC3           | 0.00 | 4.87    | 94.15   | 0.97   | 0.00                   | 19.08            | 71.31         | 9.61  |
|                    | HDAC4           | 0.84 | 0.28    | 96.38   | 2.37   | 0.14                   | 17.27            | 66.57         | 16.16 |
|                    | HDAC5           | 0.14 | 5.01    | 91.36   | 3.34   | 0.14                   | 12.12            | 80.36         | 7.52  |
|                    | HDAC6           | 0.14 | 2.23    | 94.43   | 3.20   | 0.00                   | 12.12            | 73.82         | 14.07 |
|                    | HDAC7           | 0.14 | 3.48    | 96.10   | 0.00   | 0.28                   | 11.56            | 80.64         | 7.80  |
|                    | HDAC8           | 0.00 | 1.95    | 94.43   | 3.62   | 0.00                   | 12.95            | 77.58         | 9.47  |
|                    | HDAC9           | 0.42 | 8.22    | 90.39   | 0.56   | 0.42                   | 12.26            | 73.54         | 14.21 |
|                    | HDAC10          | 0.00 | 1.67    | 83.98   | 14.35  | 0.00                   | NA               | NA            | NA    |
|                    | HDAC11          | 0.00 | 1.81    | 97.63   | 0.56   | 0.00                   | 23.12            | 74.23         | 2.65  |
|                    | SIRT1           | 0.14 | 0.84    | 98.33   | 0.70   | 0.00                   | 14.35            | 75.21         | 10.45 |
|                    | SIRT2           | 0.14 | 2.09    | 97.49   | 0.28   | 0.00                   | 9.61             | 77.72         | 12.67 |
|                    | SIRT3           | 0.28 | 3.06    | 93.31   | 3.34   | 0.00                   | 15.32            | 68.94         | 15.74 |
|                    | SIRT4           | 0.00 | 2.09    | 95.82   | 1.95   | 0.14                   | 16.57            | 71.87         | 11.56 |
|                    | SIRT5           | 0.14 | 2.51    | 95.82   | 1.53   | 0.00                   | 11.14            | 73.40         | 15.46 |
|                    | SIRT6           | 0.00 | 2.65    | 94.15   | 3.20   | 0.00                   | 10.58            | 75.07         | 14.35 |
|                    | SIRT7           | 0.14 | 7.38    | 90.39   | 1.95   | 0.14                   | 11.00            | 75.35         | 13.65 |
| <b>Luminal B</b>   | HDAC1           | 0.20 | 3.48    | 87.09   | 9.22   | 0.00                   | 20.08            | 58.61         | 21.31 |
|                    | HDAC2           | 0.20 | 2.66    | 78.69   | 18.24  | 0.20                   | 16.19            | 64.75         | 19.06 |
|                    | HDAC3           | 0.00 | 7.79    | 91.60   | 0.61   | 0.00                   | 14.14            | 69.47         | 16.39 |
|                    | HDAC4           | 1.23 | 2.66    | 90.98   | 4.71   | 0.41                   | 13.32            | 63.11         | 23.57 |
|                    | HDAC5           | 0.00 | 11.07   | 81.76   | 7.17   | 0.00                   | 17.83            | 69.88         | 12.30 |
|                    | HDAC6           | 0.00 | 4.10    | 88.73   | 7.17   | 0.00                   | 12.30            | 74.59         | 13.11 |
|                    | HDAC7           | 0.41 | 7.58    | 91.60   | 0.41   | 0.00                   | 6.97             | 82.17         | 10.86 |
|                    | HDAC8           | 0.00 | 2.87    | 89.34   | 7.79   | 0.00                   | 15.57            | 72.54         | 11.89 |
|                    | HDAC9           | 0.82 | 7.79    | 88.52   | 1.64   | 1.23                   | 14.96            | 71.52         | 13.52 |
|                    | HDAC10          | 0.00 | 4.92    | 76.84   | 18.03  | 0.20                   | NA               | NA            | NA    |
|                    | HDAC11          | 0.41 | 5.33    | 92.21   | 1.84   | 0.20                   | 22.13            | 71.52         | 6.35  |
|                    | SIRT1           | 0.20 | 0.82    | 95.29   | 3.89   | 0.00                   | 19.26            | 70.08         | 10.66 |
|                    | SIRT2           | 0.00 | 5.12    | 91.80   | 3.07   | 0.00                   | 14.96            | 75.82         | 9.22  |
|                    | SIRT3           | 0.41 | 7.58    | 85.86   | 6.15   | 0.00                   | 14.14            | 73.98         | 11.89 |
|                    | SIRT4           | 0.00 | 5.53    | 91.19   | 3.07   | 0.20                   | 13.93            | 63.73         | 22.34 |
|                    | SIRT5           | 0.82 | 5.53    | 91.39   | 2.25   | 0.00                   | 24.18            | 61.07         | 14.75 |
|                    | SIRT6           | 0.00 | 3.89    | 91.60   | 4.51   | 0.00                   | 13.93            | 70.70         | 15.37 |
|                    | SIRT7           | 1.23 | 22.54   | 72.54   | 3.69   | 0.00                   | 25.82            | 64.14         | 10.04 |
| <b>HER2</b>        | HDAC1           | 0.00 | 1.25    | 95.42   | 3.33   | 0.00                   | 11.25            | 62.92         | 25.83 |
|                    | HDAC2           | 0.83 | 4.58    | 89.58   | 4.58   | 0.42                   | 25.83            | 58.33         | 15.83 |
|                    | HDAC3           | 0.00 | 2.50    | 95.00   | 2.50   | 0.00                   | 15.83            | 60.00         | 24.17 |
|                    | HDAC4           | 0.00 | 1.25    | 96.67   | 2.08   | 0.00                   | 12.92            | 68.33         | 18.75 |
|                    | HDAC5           | 0.00 | 3.33    | 90.42   | 6.25   | 0.00                   | 15.00            | 60.42         | 24.58 |
|                    | HDAC6           | 0.42 | 3.33    | 92.92   | 3.33   | 0.00                   | 27.50            | 64.17         | 8.33  |
|                    | HDAC7           | 0.42 | 5.00    | 93.75   | 0.83   | 0.00                   | 20.42            | 70.00         | 9.58  |
|                    | HDAC8           | 0.00 | 2.92    | 90.42   | 6.67   | 0.00                   | 20.42            | 67.08         | 12.50 |
|                    | HDAC9           | 1.25 | 17.50   | 79.58   | 0.83   | 0.83                   | 17.92            | 65.42         | 16.67 |
|                    | HDAC10          | 0.00 | 5.83    | 89.17   | 5.00   | 0.00                   | NA               | NA            | NA    |
|                    | HDAC11          | 0.42 | 5.83    | 92.50   | 1.25   | 0.00                   | 14.17            | 61.67         | 24.17 |
|                    | SIRT1           | 0.00 | 2.92    | 96.25   | 0.83   | 0.00                   | 8.75             | 67.08         | 24.17 |
|                    | SIRT2           | 0.42 | 4.17    | 94.58   | 0.83   | 0.00                   | 16.25            | 58.75         | 25.00 |
|                    | SIRT3           | 0.42 | 0.83    | 91.67   | 7.08   | 0.00                   | 16.67            | 66.67         | 16.67 |
|                    | SIRT4           | 0.00 | 2.50    | 96.25   | 1.25   | 0.00                   | 15.42            | 65.42         | 19.17 |
|                    | SIRT5           | 0.00 | 7.50    | 91.67   | 0.83   | 0.00                   | 17.50            | 62.50         | 20.00 |
|                    | SIRT6           | 0.00 | 4.17    | 92.92   | 2.92   | 0.00                   | 22.92            | 65.42         | 11.67 |
|                    | SIRT7           | 0.42 | 9.58    | 87.92   | 2.08   | 0.00                   | 19.58            | 66.67         | 13.75 |
| <b>Basal-Like</b>  | HDAC1           | 0.00 | 3.04    | 94.22   | 2.74   | 0.00                   | 20.67            | 65.65         | 13.68 |
|                    | HDAC2           | 0.00 | 9.12    | 89.06   | 1.82   | 0.00                   | 44.38            | 48.94         | 6.69  |
|                    | HDAC3           | 0.00 | 0.91    | 92.71   | 6.38   | 0.00                   | 14.59            | 60.18         | 25.23 |
|                    | HDAC4           | 0.61 | 1.82    | 93.01   | 4.26   | 0.30                   | 18.54            | 69.00         | 12.46 |
|                    | HDAC5           | 0.00 | 2.43    | 93.92   | 3.65   | 0.00                   | 13.07            | 72.64         | 14.29 |
|                    | HDAC6           | 0.00 | 4.86    | 83.89   | 10.94  | 0.30                   | 16.72            | 69.30         | 13.98 |
|                    | HDAC7           | 0.00 | 2.74    | 95.74   | 1.52   | 0.00                   | 8.81             | 70.82         | 20.36 |
|                    | HDAC8           | 0.30 | 3.65    | 85.11   | 10.94  | 0.00                   | 13.07            | 72.04         | 14.89 |
|                    | HDAC9           | 0.30 | 6.69    | 89.36   | 3.04   | 0.61                   | 16.41            | 70.82         | 12.77 |
|                    | HDAC10          | 0.30 | 6.08    | 89.36   | 4.26   | 0.00                   | NA               | NA            | NA    |
|                    | HDAC11          | 0.61 | 6.99    | 89.97   | 2.43   | 0.00                   | 0.61             | 44.38         | 55.02 |
|                    | SIRT1           | 0.91 | 2.74    | 93.31   | 3.04   | 0.00                   | 9.12             | 64.13         | 26.75 |
|                    | SIRT2           | 0.91 | 13.07   | 84.80   | 1.22   | 0.00                   | 29.48            | 59.57         | 10.94 |
|                    | SIRT3           | 0.61 | 1.82    | 91.79   | 5.78   | 0.00                   | 10.94            | 73.56         | 15.50 |
|                    | SIRT4           | 0.00 | 2.74    | 95.14   | 2.13   | 0.00                   | 15.81            | 68.39         | 15.81 |
|                    | SIRT5           | 0.00 | 15.81   | 82.98   | 1.22   | 0.00                   | 34.04            | 57.14         | 8.81  |
|                    | SIRT6           | 0.00 | 4.26    | 90.27   | 5.47   | 0.00                   | 13.98            | 75.08         | 10.94 |
|                    | SIRT7           | 0.30 | 16.11   | 82.67   | 0.91   | 0.00                   | 32.83            | 58.36         | 8.81  |

**Table S6. Expression levels of HDAC genes associated with tumor grades in METABRIC breast cancer**

| Gene   | Grade 1 Mean | Grade 2 Mean | Grade 3 Mean | <i>p</i> -value (ANOVA) | <i>p</i> - value (T-test:Grade 3 vs Grade 1+2 ) |
|--------|--------------|--------------|--------------|-------------------------|-------------------------------------------------|
| HDAC1  | -0.025       | -0.036       | -0.004       | 8.4E-01                 | 5.6E-01                                         |
| HDAC2  | -0.406       | -0.330       | 0.256        | 3.0E-33                 | 2.6E-34                                         |
| HDAC3  | 0.036        | 0.085        | -0.041       | 5.2E-02                 | 1.8E-02                                         |
| HDAC4  | 0.173        | 0.039        | -0.098       | 7.1E-04                 | 5.2E-04                                         |
| HDAC5  | 0.191        | 0.112        | -0.069       | 2.1E-04                 | 5.9E-05                                         |
| HDAC6  | -0.119       | -0.047       | 0.142        | 1.4E-04                 | 3.5E-05                                         |
| HDAC7  | 0.107        | 0.047        | -0.077       | 9.4E-03                 | 3.0E-03                                         |
| HDAC8  | 0.057        | 0.028        | 0.002        | 7.6E-01                 | 5.0E-01                                         |
| HDAC9  | -0.151       | 0.006        | 0.063        | 3.0E-02                 | 6.0E-02                                         |
| HDAC11 | 0.299        | 0.212        | -0.227       | 2.7E-22                 | 3.4E-23                                         |
| SIRT1  | 0.305        | 0.110        | -0.143       | 4.5E-10                 | 7.4E-10                                         |
| SIRT2  | -0.217       | -0.022       | 0.154        | 1.2E-05                 | 2.0E-05                                         |
| SIRT3  | -0.061       | 0.017        | 0.012        | 6.5E-01                 | 8.4E-01                                         |
| SIRT4  | 0.385        | 0.020        | -0.091       | 9.4E-08                 | 1.6E-04                                         |
| SIRT5  | -0.050       | -0.004       | 0.236        | 1.1E-05                 | 1.9E-06                                         |
| SIRT6  | -0.191       | 0.024        | 0.039        | 2.5E-02                 | 2.6E-01                                         |
| SIRT7  | -0.244       | 0.035        | 0.353        | 3.8E-13                 | 2.6E-12                                         |

**Table S7. Expression levels of HDAC genes associated with lymph node metastases in METABRIC breast cancer**

| <b>Gene</b> | <b>Lymph-Negative Mean</b> | <b>Lymph-Positive Mean</b> | <b>p - value (T-test)</b> |
|-------------|----------------------------|----------------------------|---------------------------|
| HDAC1       | -0.01184                   | -0.03311                   | 0.65862                   |
| HDAC2       | -0.11201                   | 0.00005                    | 0.02240                   |
| HDAC3       | 0.04517                    | -0.00142                   | 0.33410                   |
| HDAC4       | 0.07182                    | -0.11369                   | 0.00004                   |
| HDAC5       | 0.15340                    | -0.05791                   | 0.00001                   |
| HDAC6       | 0.03230                    | 0.05356                    | 0.66028                   |
| HDAC7       | 0.05589                    | -0.06283                   | 0.00824                   |
| HDAC8       | 0.06151                    | -0.03234                   | 0.04008                   |
| HDAC9       | -0.00592                   | 0.03201                    | 0.40053                   |
| HDAC11      | 0.01349                    | 0.00090                    | 0.78261                   |
| SIRT1       | 0.04626                    | -0.04731                   | 0.04421                   |
| SIRT2       | 0.02561                    | 0.08460                    | 0.22576                   |
| SIRT3       | 0.02234                    | -0.02951                   | 0.25726                   |
| SIRT4       | -0.02542                   | 0.02863                    | 0.23752                   |
| SIRT5       | 0.08550                    | 0.11027                    | 0.62606                   |
| SIRT6       | 0.03420                    | -0.02282                   | 0.21308                   |
| SIRT7       | 0.12319                    | 0.19471                    | 0.16971                   |

**Table S8. Expression levels of HDAC genes associated with NPI score in METABRIC breast cancer**

| <b>Gene</b> | <b>Low NPI Mean</b> | <b>High NPI Mean</b> | <b><i>p</i> - value (T-test)</b> |
|-------------|---------------------|----------------------|----------------------------------|
| HDAC1       | -0.016              | -0.025               | 8.5E-01                          |
| HDAC2       | -0.361              | 0.099                | 2.6E-21                          |
| HDAC3       | 0.105               | -0.019               | 9.8E-03                          |
| HDAC4       | 0.106               | -0.080               | 1.2E-04                          |
| HDAC5       | 0.231               | -0.039               | 4.0E-07                          |
| HDAC6       | -0.041              | 0.086                | 1.0E-02                          |
| HDAC7       | 0.096               | -0.051               | 2.1E-03                          |
| HDAC8       | 0.047               | 0.001                | 3.4E-01                          |
| HDAC9       | -0.044              | 0.041                | 6.1E-02                          |
| HDAC11      | 0.212               | -0.099               | 1.2E-11                          |
| SIRT1       | 0.141               | -0.071               | 1.5E-05                          |
| SIRT2       | -0.050              | 0.108                | 1.2E-03                          |
| SIRT3       | -0.013              | 0.004                | 7.2E-01                          |
| SIRT4       | 0.106               | -0.055               | 8.2E-04                          |
| SIRT5       | -0.035              | 0.167                | 5.9E-05                          |
| SIRT6       | -0.005              | 0.014                | 7.0E-01                          |
| SIRT7       | -0.036              | 0.258                | 1.3E-08                          |

Table S9. Correlation between mRNA expression of HDAC and 129 DDR genes in TCGA breast cancers

| DDR gene | HDAC1   |          | HDAC2   |          | HDAC3   |          | HDAC4   |          | HDAC5   |          | HDAC6   |          | HDAC7   |          | HDAC8   |          | HDAC9   |          | HDAC10  |          | HDAC11  |          |
|----------|---------|----------|---------|----------|---------|----------|---------|----------|---------|----------|---------|----------|---------|----------|---------|----------|---------|----------|---------|----------|---------|----------|
|          | Pearson | Spearman |
| EXO1     | 0.1     | 0.06     | 0.52    | 0.51     | 0.05    | 0        | 0.13    | -0.05    | 0.11    | 0.13     | 0.06    | 0.06     | -0.13   | -0.16    | 0.04    | 0.02     | 0.05    | 0.03     | 0.04    | 0.03     | -0.05   | -0.1     |
| BLM      | 0.13    | 0.19     | 0.42    | 0.49     | -0.05   | -0.09    | 0.05    | -0.05    | -0.1    | -0.2     | 0.11    | 0.06     | -0.25   | -0.41    | 0.05    | 0        | 0.31    | 0.13     | -0.15   | -0.22    | -0.14   | -0.25    |
| CHEK1    | 0.17    | 0.14     | 0.58    | 0.49     | 0.02    | -0.04    | 0.08    | -0.08    | -0.1    | -0.2     | -0.02   | -0.07    | -0.35   | -0.42    | 0.04    | 0.03     | 0.08    | 0.06     | -0.21   | -0.22    | -0.23   | -0.27    |
| CD2CE5A  | 0.23    | 0.21     | 0.52    | 0.45     | 0.03    | -0.06    | 0.01    | -0.12    | -0.08   | -0.17    | 0.02    | 0        | -0.32   | -0.41    | 0.12    | 0.06     | 0.02    | 0.16     | -0.18   | -0.17    | -0.13   | -0.19    |
| MSH2     | 0.22    | 0.22     | 0.58    | 0.46     | 0.01    | 0.05     | -0.03   | -0.02    | 0.22    | 0.21     | 0.24    | 0.26     | 0.15    | 0.09     | 0.2     | 0.12     | 0.01    | -0.01    | 0.18    | 0.13     | 0.13    | 0.05     |
| MSH6     | 0.1     | 0.06     | 0.54    | 0.46     | 0.02    | 0.01     | 0.16    | 0.03     | -0.19   | -0.29    | 0.04    | -0.03    | -0.42   | -0.51    | 0.04    | -0.02    | 0.16    | 0.1      | -0.33   | -0.4     | -0.25   | -0.33    |
| RAD51    | 0.19    | 0.18     | 0.34    | 0.45     | -0.01   | 0.03     | 0.06    | 0.14     | 0.21    | 0.22     | 0.19    | 0.21     | 0.33    | 0.36     | -0.02   | -0.03    | -0.02   | -0.09    | 0.28    | 0.26     | 0.26    | 0.35     |
| RAD54L   | 0.34    | 0.34     | 0.52    | 0.45     | 0.11    | 0.01     | 0.1     | 0.13     | 0.03    | -0.07    | 0.02    | -0.08    | -0.18   | -0.16    | 0.11    | -0.04    | 0.06    | 0.2      | -0.03   | -0.02    | -0.21   | -0.29    |
| CHEK2    | 0.22    | 0.2      | 0.44    | 0.44     | 0.03    | -0.01    | -0.03   | -0.08    | -0.04   | -0.07    | -0.01   | 0        | -0.18   | -0.16    | -0.02   | 0.01     | 0.04    | 0        | -0.2    | -0.21    | -0.12   | -0.09    |
| NEIL3    | 0.19    | 0.18     | 0.42    | 0.43     | -0.04   | -0.1     | -0.04   | -0.16    | -0.15   | -0.22    | 0.03    | 0.01     | -0.36   | -0.42    | 0.04    | 0.03     | 0.08    | 0.04     | -0.2    | -0.21    | -0.15   | -0.19    |
| FANCA    | 0.25    | 0.21     | 0.38    | 0.41     | 0.05    | 0.02     | 0.07    | -0.05    | 0.04    | -0.09    | 0.11    | 0.14     | -0.26   | -0.31    | 0.04    | -0.01    | 0.08    | 0.09     | -0.04   | -0.06    | -0.11   | -0.19    |
| PCNA     | 0.21    | 0.21     | 0.42    | 0.41     | 0       | 0.04     | 0.04    | 0.11     | -0.09   | -0.08    | -0.09   | -0.06    | -0.05   | 0.04     | -0.02   | -0.01    | 0.02    | 0.06     | -0.12   | -0.12    | -0.06   | -0.01    |
| TDG      | 0.07    | -0.01    | 0.4     | 0.4      | -0.02   | -0.01    | -0.06   | -0.01    | 0.02    | -0.09    | -0.01   | 0.01     | -0.05   | 0        | 0       | 0.02     | 0.02    | -0.02    | -0.02   | -0.03    | 0.01    | -0.02    |
| FEN1     | 0.19    | 0.18     | 0.39    | 0.39     | 0.1     | 0.03     | -0.11   | -0.21    | -0.04   | -0.12    | 0.05    | 0        | -0.23   | -0.31    | 0.06    | 0.06     | 0.04    | -0.03    | -0.02   | -0.01    | -0.07   | -0.11    |
| XRCC2    | 0.14    | 0.05     | 0.41    | 0.39     | 0.14    | 0.17     | -0.13   | -0.12    | -0.26   | -0.27    | -0.15   | -0.15    | -0.23   | -0.19    | 0       | 0.06     | -0.02   | -0.01    | -0.2    | -0.18    | -0.11   | -0.14    |
| CD2CE5C  | 0.28    | 0.24     | 0.34    | 0.38     | 0.2     | 0.13     | -0.13   | -0.21    | -0.05   | -0.14    | 0.1     | 0.04     | -0.24   | -0.31    | 0.15    | 0.08     | 0.03    | -0.04    | -0.05   | -0.11    | 0.05    | -0.02    |
| FANCD2   | 0.11    | 0.12     | 0.37    | 0.01     | 0       | -0.03    | -0.03   | -0.18    | -0.24   | 0.1      | 0.05    | 0.04     | -0.31   | -0.39    | -0.04   | -0.07    | 0.03    | 0.06     | -0.15   | -0.22    | 0.02    | -0.13    |
| RNF8     | 0.08    | 0.04     | 0.41    | 0.35     | 0.14    | 0.11     | -0.02   | 0.01     | 0.1     | 0.17     | 0.13    | -0.04    | 0.01    | 0.09     | 0.08    | 0.01     | -0.03   | 0.1      | 0.15    | 0.04     | 0.11    | 0.11     |
| BRCA2    | -0.01   | -0.06    | 0.32    | 0.33     | -0.09   | -0.07    | 0.07    | 0.07     | -0.27   | -0.33    | -0.03   | -0.01    | -0.35   | -0.39    | -0.15   | -0.19    | 0.12    | 0.2      | -0.26   | -0.31    | -0.21   | -0.3     |
| SUMO1    | 0.13    | 0.17     | 0.36    | 0.32     | 0.07    | -0.02    | 0.14    | 0.21     | 0.02    | 0.07     | 0       | 0.03     | -0.02   | 0.1      | -0.02   | -0.14    | 0.08    | 0.16     | -0.08   | -0.12    | -0.12   | -0.09    |
| CSNK2A2  | 0.13    | 0.03     | 0.3     | 0.31     | 0.04    | 0        | 0.07    | 0.03     | 0       | -0.05    | 0.01    | 0.02     | -0.27   | -0.3     | 0.08    | 0.01     | 0.06    | 0.1      | -0.13   | -0.19    | -0.23   | -0.36    |
| TOPBP1   | 0.1     | 0.05     | 0.36    | 0.3      | -0.07   | -0.08    | 0.08    | 0.03     | -0.11   | -0.14    | 0.07    | 0.06     | -0.05   | -0.05    | 0.02    | 0.07     | 0.1     | 0.09     | -0.03   | -0.03    | 0.06    | 0.08     |
| RAD21    | 0.12    | 0.14     | 0.21    | 0.29     | 0.01    | -0.05    | -0.08   | -0.28    | 0.29    | 0.26     | 0.06    | 0.11     | 0.1     | 0.15     | 0.25    | 0.19     | -0.05   | -0.19    | -0.33   | 0.38     | 0.2     | 0.22     |
| UNG3     | 0.23    | 0.19     | 0.33    | 0.29     | 0.07    | 0.07     | -0.28   | 0.3      | 0.01    | -0.07    | -0.04   | 0.04     | 0.25    | 0.2      | -0.13   | 0.2      | 0.19    | -0.02    | -0.19   | -0.23    | -0.15   | -0.13    |
| MDC1     | 0.06    | 0.05     | 0.34    | 0.28     | -0.03   | -0.02    | 0.15    | 0.12     | 0.03    | -0.01    | 0.19    | 0.24     | -0.12   | -0.09    | -0.03   | -0.01    | 0.14    | 0.16     | -0.12   | -0.14    | -0.21   | -0.21    |
| POLD3    | 0.05    | 0.07     | 0.15    | 0.28     | 0.01    | 0.03     | 0.03    | 0.11     | -0.06   | -0.2     | 0.09    | -0.02    | -0.34   | -0.4     | 0.13    | 0.1      | 0.01    | 0.14     | -0.23   | -0.26    | -0.12   | -0.3     |
| SMC1A    | -0.12   | 0.07     | 0.31    | 0.28     | -0.06   | -0.04    | -0.04   | 0.06     | -0.02   | 0.05     | -0.04   | -0.03    | 0.04    | 0.16     | 0       | 0.01     | -0.08   | -0.1     | -0.04   | -0.09    | 0.02    | 0.07     |
| XRCC5    | -0.04   | -0.02    | 0.32    | 0.28     | -0.08   | -0.08    | 0.12    | 0.15     | -0.17   | -0.25    | -0.06   | -0.12    | -0.38   | -0.39    | 0.04    | -0.02    | 0.15    | 0.17     | -0.39   | -0.48    | -0.34   | -0.44    |
| BRIP1    | 0.02    | 0.03     | 0.24    | 0.27     | -0.11   | -0.12    | -0.03   | -0.08    | -0.17   | -0.24    | 0.02    | 0.04     | -0.35   | -0.48    | -0.07   | -0.1     | 0.18    | 0.14     | -0.25   | -0.34    | -0.12   | -0.18    |
| PRKDC    | 0.08    | 0.04     | 0.26    | 0.27     | -0.16   | -0.16    | -0.03   | -0.05    | -0.22   | -0.15    | -0.19   | -0.32    | -0.33   | -0.19    | -0.2    | 0.01     | 0.07    | -0.18    | -0.23   | -0.15    | -0.23   |          |
| XRCC6    | 0.12    | 0.11     | 0.27    | 0.27     | 0.07    | 0.02     | -0.02   | -0.04    | -0.04   | -0.06    | -0.05   | -0.07    | -0.31   | -0.33    | 0       | 0.03     | 0.05    | 0.04     | 0.13    | 0.15     | -0.07   | -0.15    |
| H2AFX    | 0.18    | 0.21     | 0.25    | 0.26     | 0.08    | 0.02     | -0.14   | -0.25    | -0.07   | -0.15    | -0.02   | -0.05    | -0.25   | -0.3     | 0.18    | 0.14     | 0.01    | -0.05    | -0.04   | -0.06    | -0.03   | -0.06    |
| FANCG    | 0.18    | 0.17     | 0.3     | 0.24     | 0.08    | 0.06     | -0.01   | -0.07    | 0.09    | 0.09     | 0.13    | 0.15     | -0.07   | -0.04    | 0.13    | 0.11     | 0.02    | -0.07    | 0       | 0.07     | 0.03    | 0.05     |
| RAD1     | 0.08    | 0        | 0.29    | 0.24     | 0.07    | -0.02    | -0.02   | -0.02    | 0.21    | 0.26     | 0.03    | 0.05     | 0.16    | 0.25     | 0.1     | 0.08     | -0.07   | -0.15    | 0.3     | 0.31     | 0.1     | 0.11     |
| RPA1     | 0.09    | 0.07     | 0.34    | 0.24     | 0.05    | 0.07     | 0.02    | 0.05     | 0       | -0.03    | 0.06    | 0.06     | 0.03    | 0.01     | 0.04    | 0.01     | 0.02    | -0.01    | -0.03   | -0.03    | 0.02    | 0.04     |
| PMS1     | 0       | 0        | 0.27    | 0.23     | 0.06    | 0.07     | -0.19   | -0.2     | 0.03    | 0.03     | 0.03    | 0.03     | -0.03   | -0.03    | 0.1     | 0.1      | -0.09   | -0.19    | 0.02    | 0.02     | 0.14    | 0.17     |
| HUS1     | 0.05    | -0.03    | 0.2     | 0.22     | 0.04    | 0.17     | 0.06    | 0.24     | -0.08   | -0.07    | -0.08   | 0.09     | 0.11    | 0.24     | 0.07    | -0.17    | 0.2     | 0.01     | -0.04   | -0.04    | -0.12   | -0.14    |
| PARP1    | 0.04    | 0.05     | 0.21    | 0.22     | 0.07    | 0.08     | 0.06    | 0.06     | 0.11    | -0.14    | -0.03   | -0.05    | -0.19   | -0.19    | 0.03    | 0.04     | 0.11    | 0.09     | -0.11   | -0.1     | -0.1    | -0.12    |
| PARP2    | 0.03    | 0.02     | 0.25    | 0.22     | -0.04   | -0.04    | -0.1    | -0.12    | 0.1     | 0.16     | 0.06    | 0.1      | 0.4     | 0.44     | 0.02    | 0.07     | 0       | -0.08    | 0.24    | 0.27     | 0.18    | 0.27     |
| APEX2    | 0.17    | 0.18     | 0.18    | 0.2      | 0.12    | 0.08     | -0.16   | -0.26    | 0       | -0.02    | 0.2     | 0.26     | -0.05   | -0.06    | 0.24    | 0.25     | -0.04   | -0.13    | 0.13    | 0.12     | 0.11    | 0.06     |
| RAD18    | -0.04   | -0.09    | 0.24    | 0.2      | -0.05   | -0.02    | 0.03    | 0.04     | -0.21   | -0.23    | -0.1    | -0.13    | -0.36   | -0.39    | 0.15    | 0.12     | 0.04    | 0.08     | -0.3    | -0.38    | -0.09   | -0.14    |
| RAD23B   | -0.02   | -0.04    | 0.17    | 0.2      | 0.18    | 0.12     | 0.05    | 0.06     | -0.01   | 0.03     | -0.02   | -0.02    | 0.17    | 0.19     | -0.03   | -0.02    | 0.05    | 0.25     | 0.22    | 0.24     | -0.1    | -0.09    |
| RNF168   | 0       | 0        | 0.06    | 0.06     | 0.1     | 0.24     | -0.08   | 0.22     | 0.02    | 0.16     | 0.21    | 0.01     | 0.24    | 0.21     | 0.03    | 0.02     | 0.01    | 0.02     | 0.01    | 0.29     | 0.03    | 0.12     |
| XRCC8BP1 | -0.16   | 0.15     | 0.15    | 0.18     | -0.09   | -0.08    | -0.2    | -0.33    | -0.14   | -0.19    | -0.07   | -0.12    | -0.14   | -0.19    | 0.19    | 0.16     | 0.02    | -0.06    | -0.04   | -0.01    | 0.02    | 0.03     |
| MRE11A   | -0.04   | -0.06    | 0.27    | 0.17     | 0.28    | 0.12     | 0.02    | 0.04     | 0.48    | 0.46     | 0.21    | 0.27     | 0.45    | 0.42     | 0.02    | 0.01     | -0.09   | -0.18    | 0.53    | 0.48     | 0.35    | 0.4      |
| APEX1    | 0.06    | 0.08     | 0.17    | 0.16     | 0.08    | 0.09     | -0.11   | -0.11    | -0.03   | -0.01    | 0.01    | -0.03    | -0.02   | 0.06     | 0.1     | 0.08     | -0.04   | -0.2     | 0.03    | 0.08     | 0.12    | 0.13     |
| MBD4     | 0.15    | 0.1      | 0.2     | 0.16     | 0.05    | 0.02     | -0.01   | -0.01    | 0.03    | 0.02     | 0.04    | 0.04     | 0.02    | 0.01     | 0.03    | 0.01     | -0.01   | 0.03     | 0.06    | -0.02    | 0.01    | -0.01    |
| BARB1    | -0.05   | -0.05    | 0.18    | 0.15     | -0.11   | -0.08    | 0.21    | 0.21     | -0.21   | -0.24    | -0.03   | -0.03    | -0.34   | -0.35    | -0.22   | -0.24    | 0.14    | 0.22     | -0.32   | -0.37    | -0.19   | -0.2     |
| ERCC3    | 0.1     | 0.19     | 0.15    | -0.02    | 0.1     | 0.09     | 0.09    | 0.07     | 0.07    | 0.07     | 0.12    | 0.22     | -0.23   | -0.27    | 0.1     | 0.1      | 0.06    | 0.1      | 0.06    | -0.06    | -0.05   | -0.05    |
| DMC2     | 0.17    | 0.11     | 0.18    | 0.12     | -0.08   | -0.09    | 0.02    | 0.02     | -0.07   | 0.05     | 0.01    | -0.11    | -0.06   | -0.17    | -0.19   | 0.05     | 0.04    | 0.21     | -0.02   | -0.14    | -0.13   | -0.13    |
| DDB1     | 0.04    | 0.03     | 0.05    | 0.11     | -0.01   | 0        | -0.13   | -0.12    | -0.13   | -0.16    | -0.02   | -0.03    | -0.27   | -0.3     | -0.14   | -0.14    | -0.01   | -0.06    | -0.12   | -0.16    | -0.05   | -0.07    |
| NBN      | -0.05   | -0.08    | 0.07    | 0.11     | -0.05   | -0.05    | -0.07   | -0.15    | -0.11   | -0.13    | -0.08   | -0.2     | -0.09   | 0.02     | -0.05   | -0.1     | 0.01    | -0.01    | 0.03    | 0.05     | -0.09   | 0.02     |
| MUTYH    | 0.36    | 0.39     | 0.26    | 0.1      | 0       | 0.04     | 0.08    | 0.13     | -0.02   | -0.02    | 0.03    | 0.03     | 0.03    | 0.04     | -0.05   | -0.04    | 0.11    | 0.25     | 0.03    | 0.02     | -0.1    | -0.11    |
| RAD51C   | 0.05    | 0.07     | 0.07    | 0.07     | 0.1     | -0.08    | 0.01    | 0.04     | 0.07    | 0.09     | 0.1     | -0.04    | -0.03   | -0.14    | -0.12   | 0.04     | 0.08    | 0.05     | -0.08   | -0.12    | -0.09   | -0.05    |
| TP53     | -0.02   | -0.04    | 0.14    | 0.1      | -0.09   | -0.05    | 0.11    | 0.17     | -0.29   | -0.27    | 0       | -0.05    | -0.28   | -0.26    | -0.15   | -0.13    | 0.13    | 0.13     | -0.32   | -0.35    | -0.17   | -0.15    |
| ATR      | -0.04   | -0.1     | 0.12    | 0.09     | -0.12   | -0.09    | 0.09    | 0.15     | 0.15    | -0.22    | -0.06   | 0.04     | -0.33   | -0.33    | -0.04   | -0.07    | 0.07    | 0.13     | -0.34   | -0.39    | -0.28   | -0.28    |
| CRY1     | -0.14   | -0.16    | 0.1     | 0.09     | -0.09   | -0.07    | 0.2     | 0.2      | -0.14   | -0.14    | -0.04   | -0.02    | -0.14   | -0.13    | -0.15   | -0.16    | 0.04    | 0.15     | -0.28   | -0.29    | -0.24   | -0.27    |
| LIG1     | 0.15    | 0.19     | 0.18    | 0.09     | -0.05   | -0.07    | -0.1    | -0.1     | 0.09    | 0.16     | 0.08    | 0.16     |         |          |         |          |         |          |         |          |         |          |

## Supplementary Figure Legends

Supplementary Figure S1: Expression level of HDAC2 across five subtypes of METABRIC breast cancers.

Supplementary Figure S2: mRNA expression levels from RNA-Seq (GSE48216) of HDAC1-11 in a panel of 51 breast cancer cell lines compared with 5 normal mammary epithelial cell lines. Cell lines: green indicates normal mammary epithelial cell lines; red, basal-like breast cancer cell lines; and blue, Luminal breast cancer cell lines.

Supplementary Figure S3: mRNA expression levels from RNA-Seq (GSE48216) of SIRT1-7 in a panel of 51 breast cancer cell lines compared with 5 normal mammary epithelial cell lines. Cell lines: green indicates normal mammary epithelial cell lines; red, basal-like breast cancer cell lines; and blue, Luminal breast cancer cell lines.

Supplementary Figure S4: mRNA expression level of HDAC11, measured by qRT-PCR, in a panel of 21 breast cancer cell lines. mRNA expression levels in MCF10A cells were arbitrarily set as 1. Relative expression levels are shown as fold changes compared with those of MCF10A cells.

Supplementary Figure S5: Apoptosis in HCC1937 cells treated with mocetinostat for 48 hours was assessed by AnnexinV/ propidium iodide (PI) double staining, early and late apoptosis was quantified and indicated in Q3 and Q2 gates respectively. The apoptosis rates of cells are indicated.

Supplementary Figure S6: Expression level of RAD51 across five subtypes of TCGA breast cancers

Supplementary Figure S7: Based on their expression in 144 normal breast samples compared with 1980 cancer samples in the METABRIC cohort, HDAC1 and HDAC2 were highly expressed in tumor versus normal cells.

Supplementary Figure S8: qRT-PCR analysis of HDAC11 expression after treatment with tamoxifen (TAM) in ZR75-1 Luminal breast cancer line.

Figure S1

### HDAC2 (METABRIC)

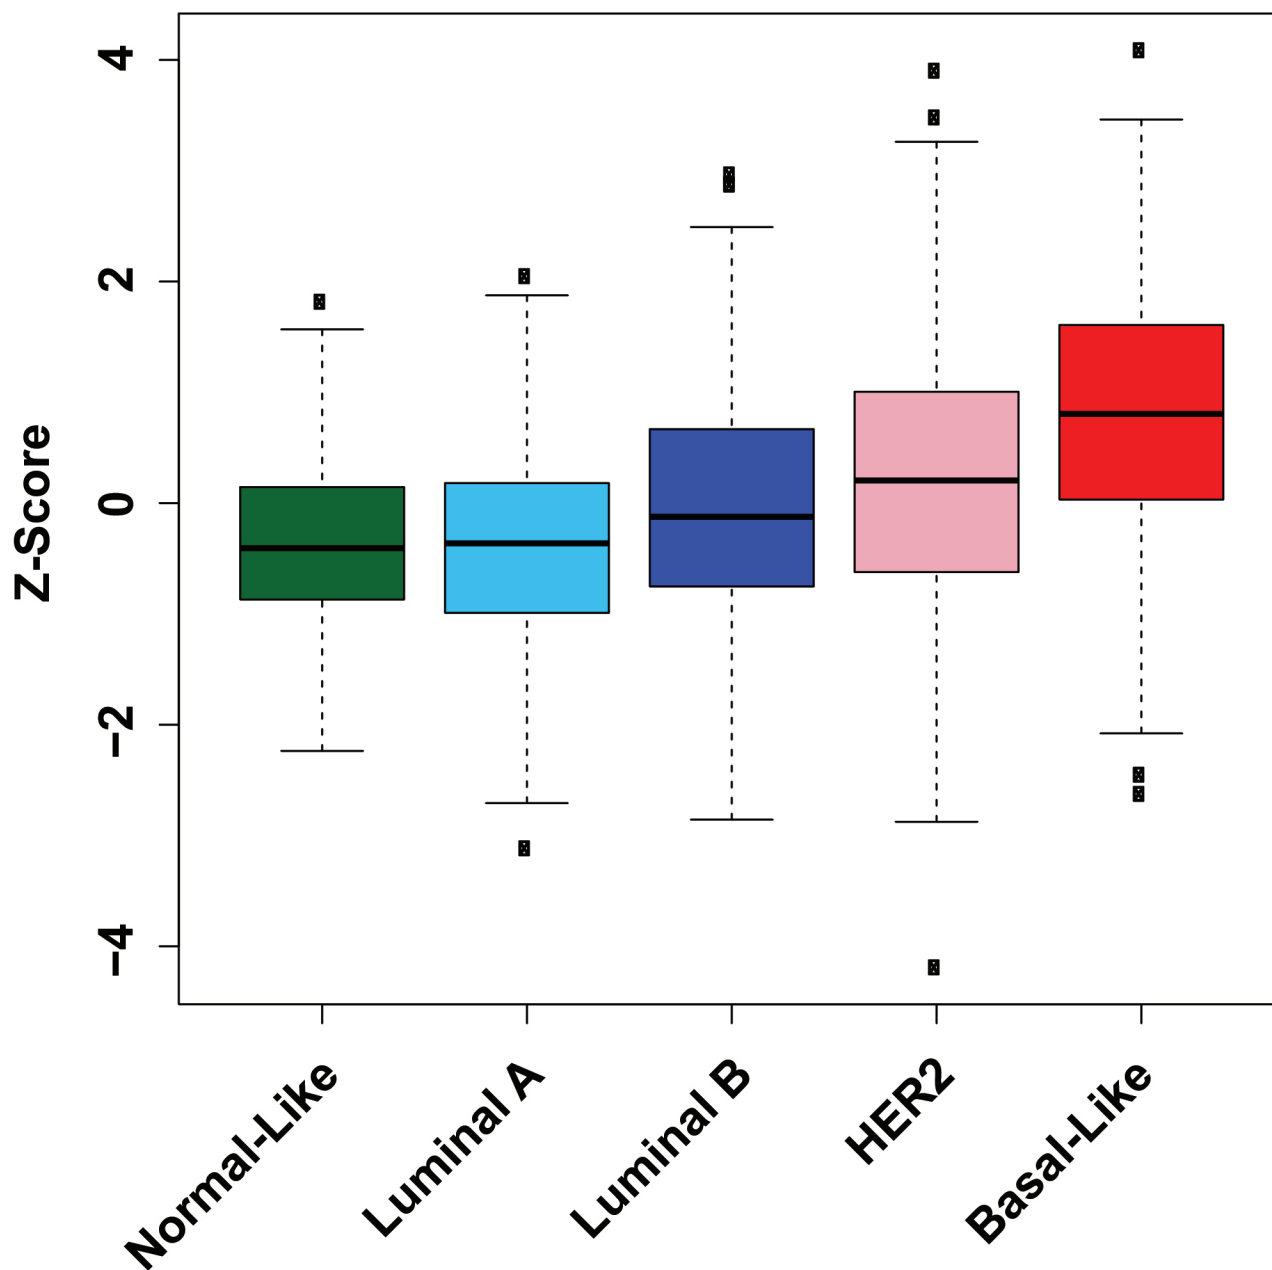





Figure S3

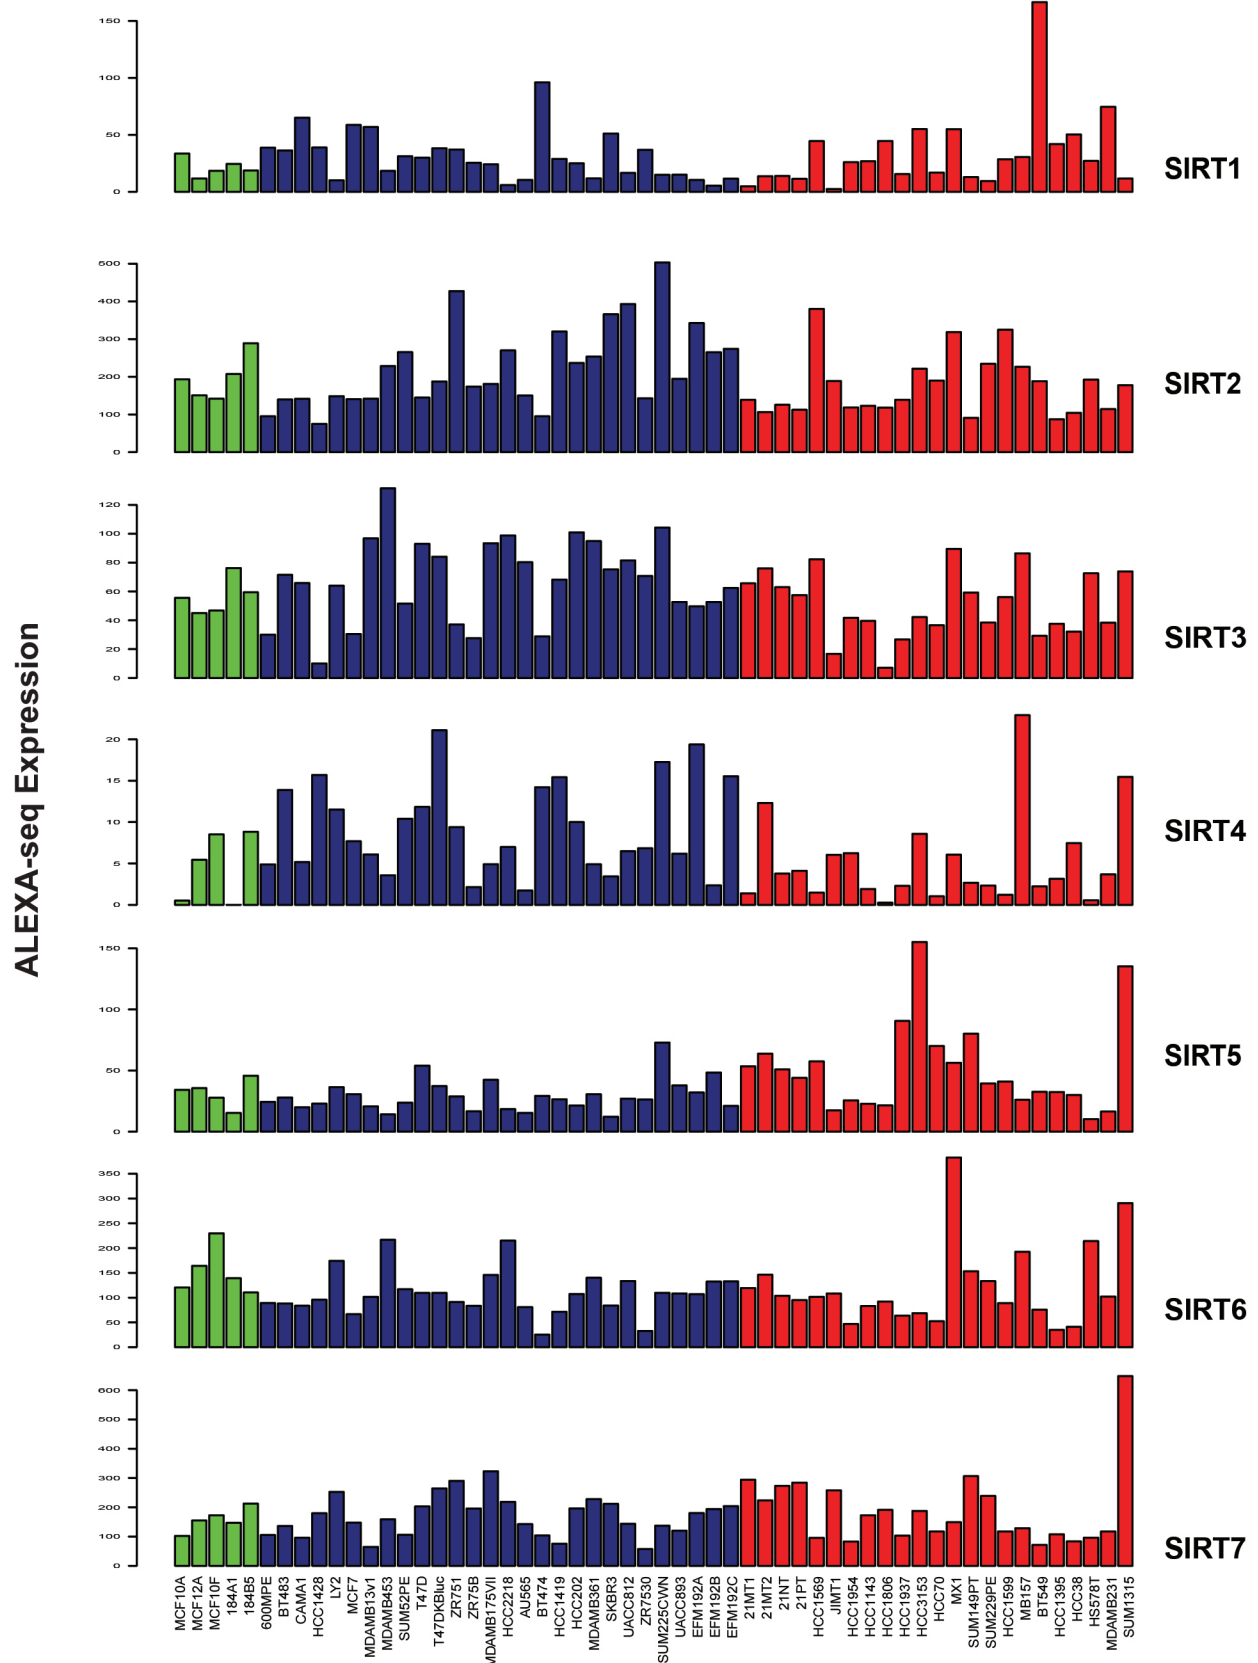

Figure S4

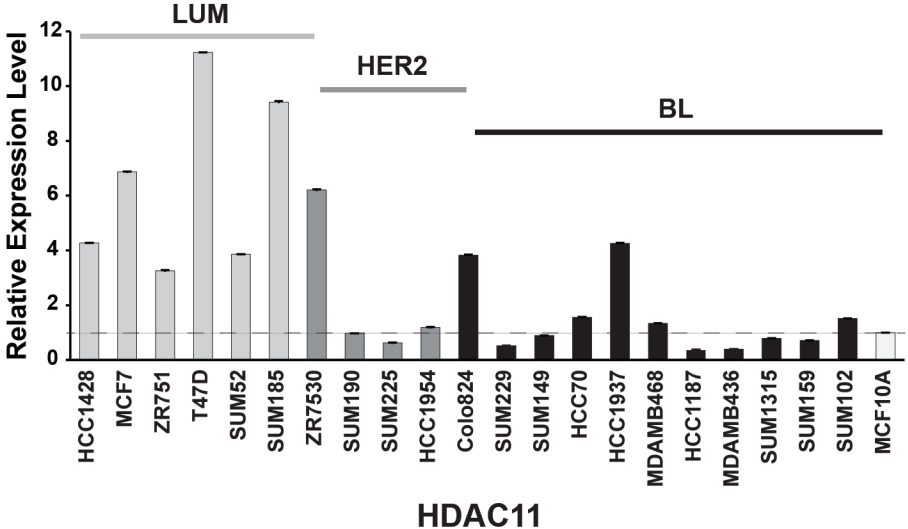

Figure S5

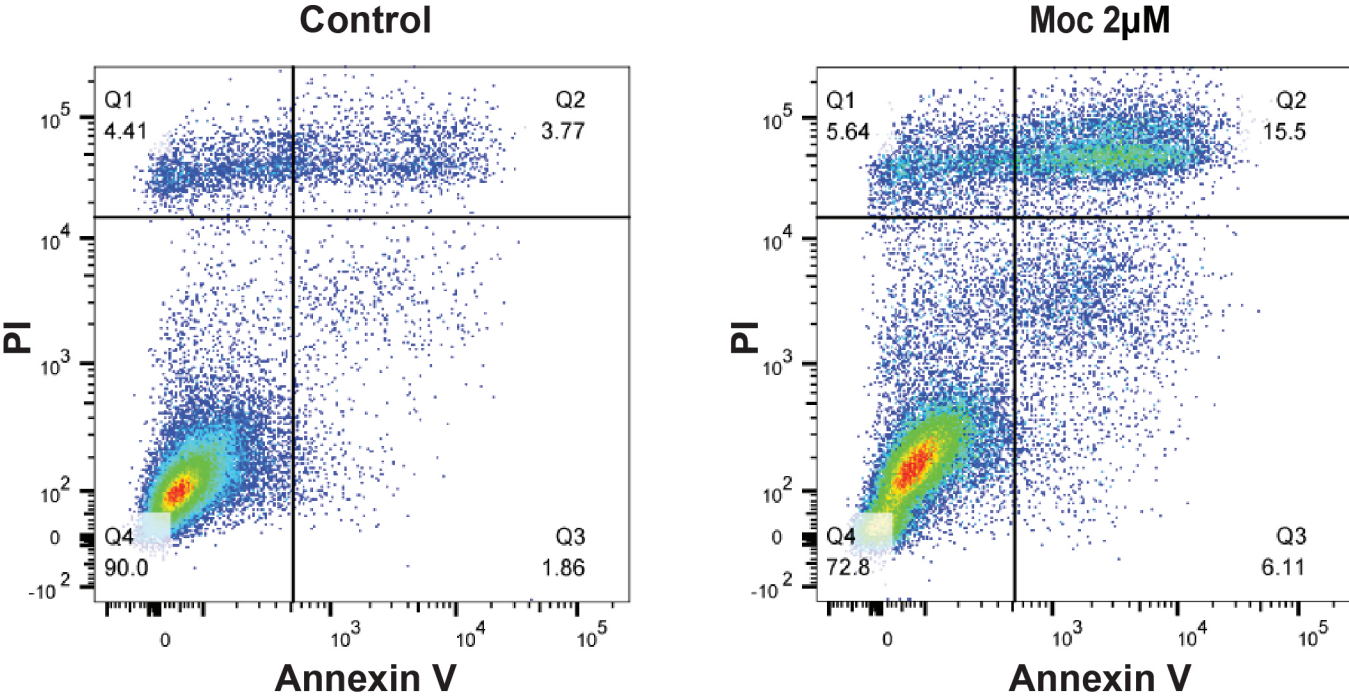

Figure S6

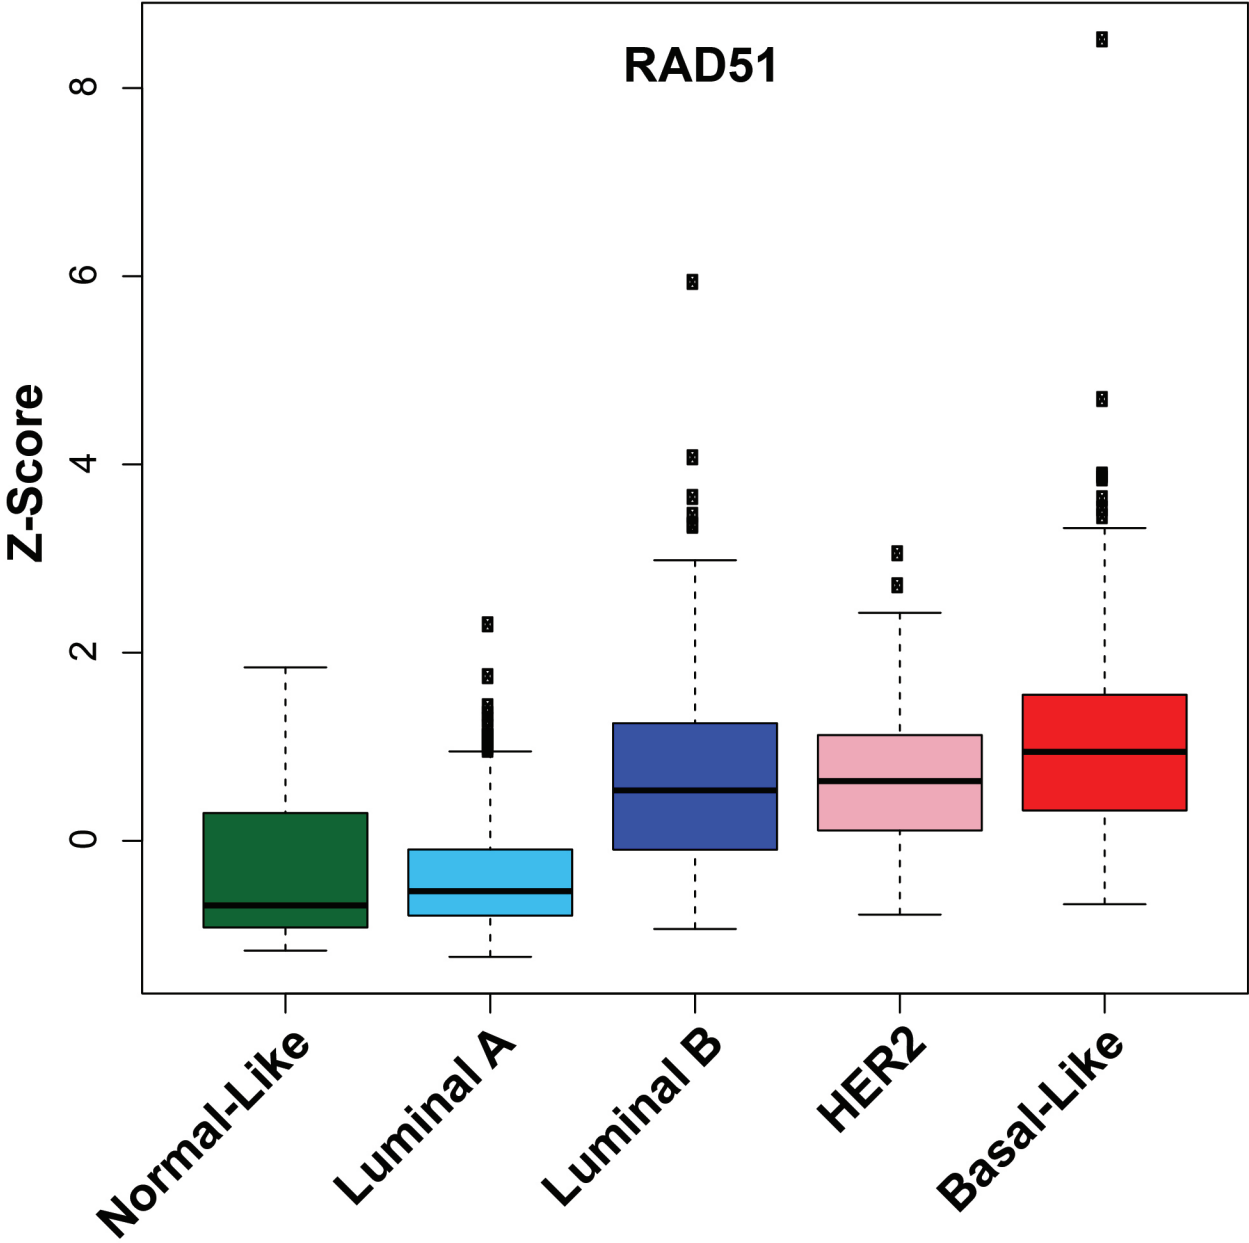

Figure S7

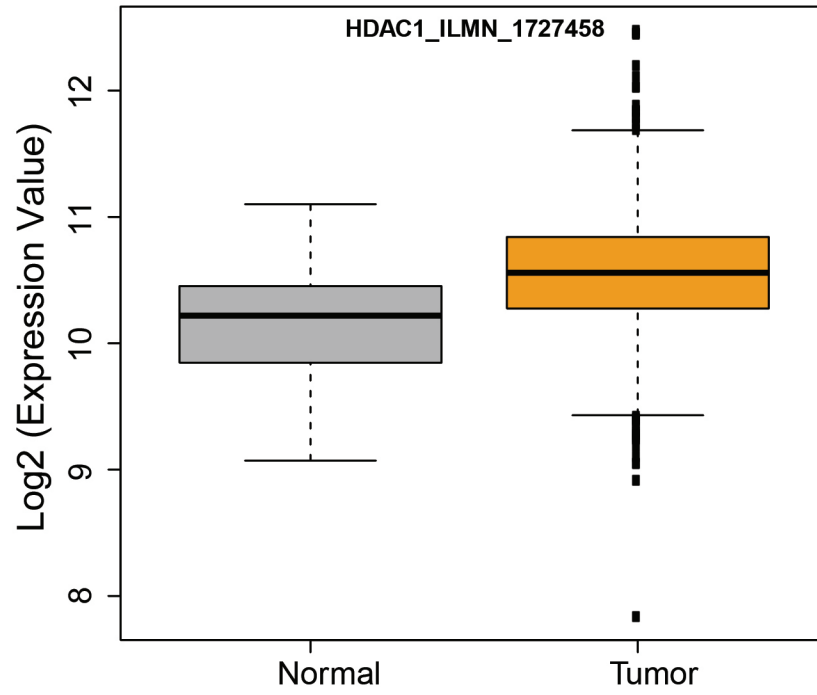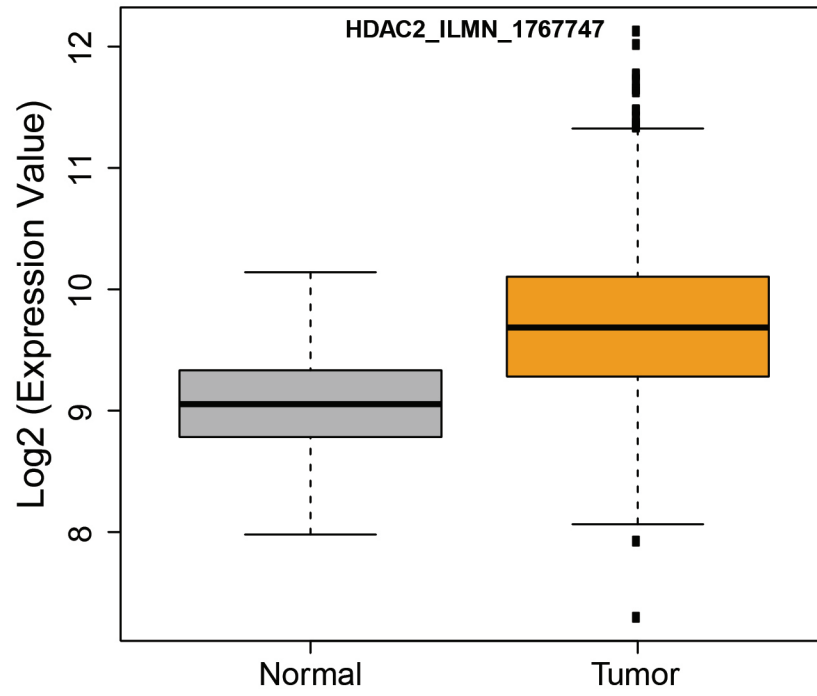

Figure S8

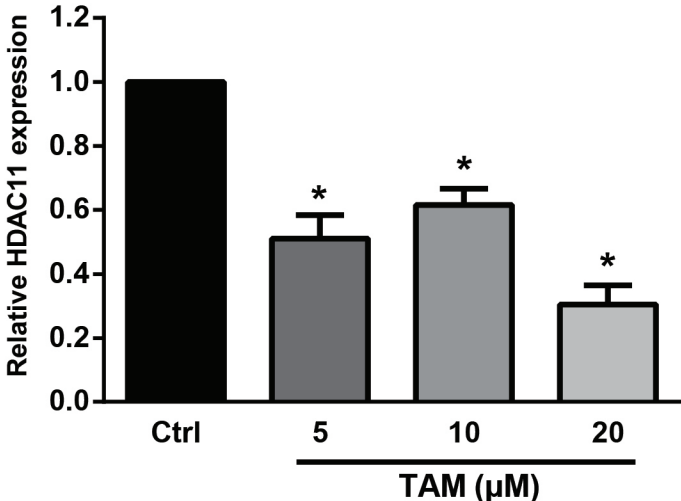

Supplement: ajcr0007-1213-f6.pdf [file ajcr0007-1213-f6.pdf]
